# Supplementary material
Source: Springer Nature journal article supplement (https://www.springermedizin.de/resource/supplementary/12891_2010_947_MOESM1_ESM.pdf/9506772)
Supplement: MOESM1 [file 9506772]

**Records identified through  
database searching  
(10,642)**

**Additional records  
identified through other  
sources  
(n = 39)**

**Records after duplicates removed  
(n = 2920)**

**Records screened  
(n = 2920)**  
By title and abstract

**Records excluded  
(2764)**  
Did not meet inclusion  
criteria (study design)

**Full-text articles assessed  
for eligibility  
(n = 156)**  
Databases (117)  
Reference lists (39)

**Full-text articles excluded  
(n = 149)**  
No AKP-PFOA temporal data  
(117)  
Review article (30)  
Editorial (2)

**Studies included in  
synthesis  
(n = 7)**  
Databases (6)  
Reference lists (1)
